# Supplementary material for: Effects of a Synbiotic Formula on Functional Bowel Disorders and Gut Microbiota Profile during Long-Term Home Enteral Nutrition (LTHEN): A Pilot Study
Source: PubMed Central journal article supplement (PMC7824736; doi:10.3390/nu13010087), 2020-12-29
Supplement: nutrients-13-00087-s001.pdf [file nutrients-13-00087-s001.pdf]

### Supplementary materials

**Supplementary Table S1.** Mann–Whitney test of bacterial taxa between T0 and T1 in CG and IG groups. Average values of relative abundances of each OTU and the p values of each comparison were reported.

| Bacterial Taxa |                          | CG     |        |         | IG     |        |         |
|----------------|--------------------------|--------|--------|---------|--------|--------|---------|
| Phylum         | Genus                    | T0     | T1     | p-value | T0     | T1     | p-value |
| [Thermi]       | <i>Deinococcus</i>       | 0.002  | 0.000  | 0.374   | 0.000  | 0.000  | NA      |
| Actinobacteria | <i>Actinobaculum</i>     | 0.002  | 0.001  | 1.000   | 0.019  | 0.000  | 0.242   |
| Actinobacteria | <i>Actinomyces</i>       | 0.674  | 0.137  | 0.920   | 0.643  | 0.060  | 0.909   |
| Actinobacteria | <i>Adlercreutzia</i>     | 0.000  | 0.000  | NA      | 0.000  | 0.000  | NA      |
| Actinobacteria | <i>Atopobium</i>         | 0.012  | 0.000  | 0.077   | 0.005  | 0.000  | 0.167   |
| Actinobacteria | <i>Bifidobacterium</i>   | 12.497 | 8.249  | 0.190   | 6.062  | 6.450  | 0.847   |
| Actinobacteria | <i>Brevibacterium</i>    | 0.016  | 0.007  | 0.332   | 0.304  | 0.044  | 0.582   |
| Actinobacteria | <i>Collinsella</i>       | 2.629  | 5.768  | 0.508   | 1.783  | 0.161  | 0.742   |
| Actinobacteria | <i>Corynebacterium</i>   | 1.537  | 0.034  | 1.000   | 0.121  | 0.013  | 0.662   |
| Actinobacteria | <i>Eggerthella</i>       | 3.860  | 1.012  | 0.258   | 0.340  | 0.522  | 0.669   |
| Actinobacteria | <i>Mobiluncus</i>        | 0.002  | 0.000  | 0.374   | 0.000  | 0.001  | 0.363   |
| Actinobacteria | <i>N09</i>               | 0.000  | 0.000  | NA      | 0.000  | 0.000  | 0.363   |
| Actinobacteria | <i>Propionibacterium</i> | 0.013  | 0.009  | 0.258   | 0.002  | 0.003  | 0.660   |
| Actinobacteria | <i>Pseudoclavibacter</i> | 0.000  | 0.001  | 0.374   | 0.000  | 0.000  | NA      |
| Actinobacteria | <i>Slackia</i>           | 0.005  | 0.003  | 1.000   | 0.001  | 0.000  | 0.363   |
| Bacteroidetes  | 5-7N15                   | 0.000  | 0.000  | NA      | 0.000  | 0.000  | NA      |
| Bacteroidetes  | <i>Bacteroides</i>       | 12.173 | 14.273 | 0.387   | 11.424 | 22.830 | 0.652   |
| Bacteroidetes  | <i>Butyricimonas</i>     | 0.436  | 0.668  | 0.859   | 0.225  | 0.204  | 0.461   |
| Bacteroidetes  | <i>Cloacibacterium</i>   | 0.002  | 0.000  | 0.374   | 0.000  | 0.000  | NA      |
| Bacteroidetes  | <i>Dysgonomonas</i>      | 0.000  | 0.000  | NA      | 0.003  | 0.009  | 1.000   |
| Bacteroidetes  | <i>Flavobacterium</i>    | 0.039  | 0.000  | 0.005   | 0.006  | 0.000  | 0.056   |
| Bacteroidetes  | <i>Flectobacillus</i>    | 0.000  | 0.000  | NA      | 0.000  | 0.000  | NA      |
| Bacteroidetes  | <i>Fluviicola</i>        | 0.001  | 0.000  | 0.374   | 0.002  | 0.000  | 0.363   |
| Bacteroidetes  | <i>Odoribacter</i>       | 0.256  | 0.278  | 0.859   | 0.911  | 0.135  | 0.893   |
| Bacteroidetes  | <i>Paludibacter</i>      | 0.000  | 0.000  | NA      | 0.000  | 0.005  | 0.363   |

|               |                                   |       |       |       |       |       |       |
|---------------|-----------------------------------|-------|-------|-------|-------|-------|-------|
| Bacteroidetes | <i>Parabacteroides</i>            | 6.754 | 2.054 | 0.605 | 1.692 | 1.449 | 0.577 |
| Bacteroidetes | <i>Paraprevotella</i>             | 0.102 | 0.049 | 1.000 | 0.121 | 0.042 | 0.336 |
| Bacteroidetes | <i>Porphyromonas</i>              | 0.303 | 0.008 | 0.911 | 0.001 | 0.000 | 0.363 |
| Bacteroidetes | <i>Prevotella</i>                 | 0.030 | 0.026 | 0.763 | 0.033 | 0.052 | 0.730 |
| Chlamydiae    | <i>Candidatus Rhabdochlamydia</i> | 0.012 | 0.000 | 0.169 | 0.000 | 0.000 | NA    |
| Euryarchaeota | <i>Methanobacterium</i>           | 0.027 | 0.003 | 1.000 | 0.000 | 0.000 | NA    |
| Euryarchaeota | <i>Methanobrevibacter</i>         | 7.012 | 9.969 | 1.000 | 0.738 | 0.594 | 0.818 |
| Euryarchaeota | <i>Methanosphaera</i>             | 0.078 | 0.031 | 1.000 | 0.000 | 0.001 | 0.167 |
| Firmicutes    | [ <i>Eubacterium</i> ]            | 0.570 | 0.165 | 0.791 | 3.920 | 2.287 | 0.843 |
| Firmicutes    | [ <i>Ruminococcus</i> ]           | 1.513 | 3.098 | 0.863 | 2.085 | 1.160 | 0.332 |
| Firmicutes    | <i>Acidaminococcus</i>            | 0.096 | 0.090 | 0.920 | 0.689 | 0.022 | 0.362 |
| Firmicutes    | <i>Anaerococcus</i>               | 0.005 | 0.005 | 1.000 | 0.011 | 0.000 | 0.167 |
| Firmicutes    | <i>Anaerofustis</i>               | 0.003 | 0.020 | 0.275 | 0.001 | 0.001 | 1.000 |
| Firmicutes    | <i>Anaerostipes</i>               | 0.005 | 0.001 | 0.275 | 0.000 | 0.000 | 0.363 |
| Firmicutes    | <i>Anaerotruncus</i>              | 1.199 | 1.267 | 1.000 | 0.535 | 0.209 | 0.468 |
| Firmicutes    | <i>Bacillus</i>                   | 0.021 | 0.000 | 0.374 | 0.000 | 0.000 | NA    |
| Firmicutes    | <i>Blautia</i>                    | 2.350 | 0.194 | 0.387 | 5.702 | 6.464 | 0.797 |
| Firmicutes    | <i>Bulleidia</i>                  | 0.021 | 0.006 | 0.497 | 0.001 | 0.000 | 1.000 |
| Firmicutes    | cc_115                            | 0.001 | 0.001 | 1.000 | 0.004 | 0.011 | 0.592 |
| Firmicutes    | <i>Christensenella</i>            | 1.235 | 0.144 | 0.212 | 0.172 | 0.102 | 0.894 |
| Firmicutes    | <i>Clostridium</i>                | 0.050 | 0.030 | 0.115 | 0.004 | 0.003 | 0.721 |
| Firmicutes    | <i>Coprobacillus</i>              | 0.067 | 0.083 | 1.000 | 0.030 | 0.006 | 0.531 |
| Firmicutes    | <i>Coprococcus</i>                | 1.071 | 0.338 | 0.297 | 0.383 | 0.430 | 0.974 |
| Firmicutes    | <i>Dehalobacterium</i>            | 0.057 | 0.026 | 0.579 | 0.014 | 0.008 | 1.000 |
| Firmicutes    | <i>Desulfitobacter</i>            | 0.000 | 0.003 | 0.374 | 0.004 | 0.000 | 0.363 |
| Firmicutes    | <i>Dialister</i>                  | 0.002 | 0.012 | 0.655 | 0.475 | 0.119 | 0.947 |
| Firmicutes    | <i>Dorea</i>                      | 0.947 | 5.042 | 0.387 | 0.658 | 0.710 | 0.870 |
| Firmicutes    | <i>Enterococcus</i>               | 2.327 | 1.207 | 0.605 | 3.353 | 0.566 | 0.307 |
| Firmicutes    | <i>Epulopiscium</i>               | 0.000 | 0.003 | 0.169 | 0.000 | 0.000 | NA    |
| Firmicutes    | <i>Facklamia</i>                  | 0.008 | 0.006 | 1.000 | 0.000 | 0.000 | NA    |
| Firmicutes    | <i>Faecalibacterium</i>           | 0.025 | 0.007 | 0.032 | 0.033 | 0.012 | 0.756 |

|            |                                     |       |       |       |       |       |       |
|------------|-------------------------------------|-------|-------|-------|-------|-------|-------|
| Firmicutes | <i>Finegoldia</i>                   | 0.002 | 0.020 | 0.587 | 0.017 | 0.001 | 0.474 |
| Firmicutes | <i>Geobacillus</i>                  | 0.001 | 0.000 | 0.374 | 0.000 | 0.000 | NA    |
| Firmicutes | <i>Holdmania</i>                    | 0.023 | 0.009 | 0.823 | 0.033 | 0.013 | 0.658 |
| Firmicutes | <i>Jeotgalicoccus</i>               | 0.000 | 0.034 | 0.374 | 0.000 | 0.000 | NA    |
| Firmicutes | <i>Lachnospira</i>                  | 0.001 | 0.000 | 0.374 | 0.000 | 0.000 | NA    |
| Firmicutes | <i>Lactobacillus</i>                | 0.416 | 0.930 | 0.532 | 0.880 | 0.940 | 0.286 |
| Firmicutes | <i>Lactococcus</i>                  | 0.002 | 0.016 | 0.737 | 0.013 | 0.014 | 0.660 |
| Firmicutes | <i>Leuconostoc</i>                  | 0.009 | 0.001 | 1.000 | 0.010 | 0.008 | 0.961 |
| Firmicutes | <i>Megasphaera</i>                  | 0.255 | 0.029 | 0.396 | 1.969 | 0.387 | 0.840 |
| Firmicutes | <i>Mitsuokella</i>                  | 0.033 | 0.003 | 1.000 | 0.000 | 0.000 | NA    |
| Firmicutes | <i>Mogibacterium</i>                | 0.013 | 0.000 | 0.374 | 0.000 | 0.000 | NA    |
| Firmicutes | <i>Oscillospira</i>                 | 5.253 | 1.097 | 0.222 | 2.022 | 3.260 | 0.797 |
| Firmicutes | p-75-a5                             | 0.010 | 0.006 | 1.000 | 0.000 | 0.000 | NA    |
| Firmicutes | <i>Parvimonas</i>                   | 0.013 | 0.002 | 0.587 | 0.007 | 0.001 | 1.000 |
| Firmicutes | <i>Pediococcus</i>                  | 0.010 | 0.000 | 0.374 | 0.000 | 0.113 | 0.363 |
| Firmicutes | <i>Peptococcus</i>                  | 0.087 | 0.001 | 0.225 | 0.026 | 0.269 | 0.849 |
| Firmicutes | <i>Peptoniphilus</i>                | 0.043 | 0.042 | 0.763 | 0.019 | 0.000 | 0.363 |
| Firmicutes | <i>Peptostreptococcus</i>           | 0.000 | 0.003 | 0.169 | 0.000 | 0.000 | 0.363 |
| Firmicutes | ph2                                 | 0.000 | 0.002 | 0.374 | 0.000 | 0.000 | NA    |
| Firmicutes | <i>Phascolarctobacterium</i>        | 0.180 | 0.274 | 1.000 | 1.792 | 4.858 | 0.679 |
| Firmicutes | <i>Pseudoramibacter_Eubacterium</i> | 5.568 | 0.736 | 0.330 | 0.220 | 0.169 | 0.322 |
| Firmicutes | <i>Roseburia</i>                    | 0.010 | 0.003 | 0.160 | 0.006 | 0.004 | 0.943 |
| Firmicutes | <i>Ruminococcus</i>                 | 6.024 | 1.448 | 0.190 | 0.684 | 0.952 | 0.797 |
| Firmicutes | SMB53                               | 0.281 | 0.162 | 1.000 | 0.507 | 0.044 | 0.535 |
| Firmicutes | <i>Sporanaerobacter</i>             | 0.000 | 0.000 | NA    | 0.000 | 0.000 | NA    |
| Firmicutes | <i>Staphylococcus</i>               | 0.067 | 0.003 | 0.073 | 0.126 | 0.007 | 0.867 |
| Firmicutes | <i>Streptococcus</i>                | 0.198 | 0.089 | 0.655 | 0.101 | 0.095 | 0.640 |
| Firmicutes | <i>Syntrophomonas</i>               | 0.000 | 0.000 | NA    | 0.000 | 0.000 | NA    |
| Firmicutes | <i>Turicibacter</i>                 | 0.025 | 0.002 | 0.856 | 0.009 | 0.001 | 1.000 |
| Firmicutes | <i>Veillonella</i>                  | 0.002 | 0.007 | 1.000 | 0.000 | 0.003 | 0.167 |
| Firmicutes | WAL_1855D                           | 0.000 | 0.013 | 0.034 | 0.000 | 0.000 | NA    |

|                |                         |       |       |       |       |       |       |
|----------------|-------------------------|-------|-------|-------|-------|-------|-------|
| Fusobacteria   | <i>Fusobacterium</i>    | 0.005 | 0.001 | 0.683 | 0.006 | 0.000 | 0.167 |
| Planctomycetes | <i>Planctomyces</i>     | 0.003 | 0.000 | 0.374 | 0.000 | 0.000 | NA    |
| Proteobacteria | <i>Acetobacter</i>      | 0.000 | 0.000 | NA    | 0.000 | 0.000 | NA    |
| Proteobacteria | <i>Achromobacter</i>    | 0.004 | 0.000 | 0.374 | 0.000 | 0.000 | NA    |
| Proteobacteria | <i>Acinetobacter</i>    | 0.033 | 0.012 | 0.576 | 2.237 | 0.265 | 0.721 |
| Proteobacteria | <i>Aggregatibacter</i>  | 0.004 | 0.000 | 0.374 | 0.000 | 0.008 | 0.363 |
| Proteobacteria | <i>Agrobacterium</i>    | 0.049 | 0.000 | 0.034 | 0.000 | 0.005 | 0.078 |
| Proteobacteria | <i>Alcanivorax</i>      | 0.006 | 0.000 | 0.169 | 0.000 | 0.000 | NA    |
| Proteobacteria | <i>Arcobacter</i>       | 0.015 | 0.000 | 0.374 | 0.000 | 0.000 | NA    |
| Proteobacteria | <i>Bdellovibrio</i>     | 0.007 | 0.000 | 0.374 | 0.000 | 0.000 | NA    |
| Proteobacteria | <i>Bilophila</i>        | 0.074 | 0.045 | 0.280 | 0.174 | 0.085 | 0.123 |
| Proteobacteria | <i>Blastomonas</i>      | 0.001 | 0.000 | 0.374 | 0.000 | 0.000 | NA    |
| Proteobacteria | <i>Campylobacter</i>    | 0.000 | 0.000 | NA    | 0.047 | 0.019 | 1.000 |
| Proteobacteria | <i>Citrobacter</i>      | 1.153 | 0.152 | 0.683 | 1.903 | 0.006 | 0.582 |
| Proteobacteria | <i>Delftia</i>          | 0.015 | 0.001 | 0.225 | 0.000 | 0.000 | NA    |
| Proteobacteria | <i>Desulfovibrio</i>    | 0.396 | 0.351 | 0.859 | 0.830 | 0.321 | 0.946 |
| Proteobacteria | <i>Hyphomicrobium</i>   | 0.003 | 0.000 | 0.374 | 0.000 | 0.000 | NA    |
| Proteobacteria | <i>Lautropia</i>        | 0.001 | 0.000 | 0.374 | 0.000 | 0.000 | NA    |
| Proteobacteria | <i>Methylobacterium</i> | 0.000 | 0.000 | NA    | 0.000 | 0.000 | NA    |
| Proteobacteria | <i>Neisseria</i>        | 0.000 | 0.005 | 0.169 | 0.000 | 0.000 | 0.363 |
| Proteobacteria | <i>Novosphingobium</i>  | 0.001 | 0.000 | 0.374 | 0.001 | 0.000 | 0.363 |
| Proteobacteria | <i>Ochrobactrum</i>     | 0.006 | 0.001 | 0.118 | 0.004 | 0.001 | 0.531 |
| Proteobacteria | <i>Oligella</i>         | 0.000 | 0.003 | 0.374 | 0.000 | 0.000 | NA    |
| Proteobacteria | <i>Proteus</i>          | 0.000 | 0.000 | NA    | 0.001 | 0.000 | 0.363 |
| Proteobacteria | <i>Pseudomonas</i>      | 0.089 | 0.012 | 0.269 | 0.018 | 0.002 | 0.721 |
| Proteobacteria | <i>Psychrobacter</i>    | 0.008 | 0.000 | 0.169 | 0.000 | 0.002 | 0.363 |
| Proteobacteria | <i>Ralstonia</i>        | 0.005 | 0.000 | 0.374 | 0.000 | 0.000 | NA    |
| Proteobacteria | <i>Rhodobacter</i>      | 0.010 | 0.000 | 0.374 | 0.000 | 0.000 | NA    |
| Proteobacteria | <i>Sphingobium</i>      | 0.001 | 0.000 | 0.374 | 0.000 | 0.000 | NA    |
| Proteobacteria | <i>Sphingomonas</i>     | 0.023 | 0.000 | 0.169 | 0.003 | 0.001 | 1.000 |
| Proteobacteria | <i>Stenotrophomonas</i> | 0.019 | 0.011 | 0.371 | 0.000 | 0.000 | NA    |

|                 |                                     |        |        |       |        |        |       |
|-----------------|-------------------------------------|--------|--------|-------|--------|--------|-------|
| Proteobacteria  | <i>Sutterella</i>                   | 0.058  | 0.007  | 0.706 | 0.008  | 0.001  | 0.066 |
| Synergistetes   | <i>Pyramidobacter</i>               | 0.000  | 0.001  | 0.374 | 0.151  | 0.006  | 0.531 |
| Verrucomicrobia | <i>Akkermansia</i>                  | 19.369 | 40.135 | 0.258 | 43.567 | 43.542 | 1.000 |
| Verrucomicrobia | <i>Candidatus Xiphinematobacter</i> | 0.020  | 0.000  | 0.169 | 0.001  | 0.000  | 0.363 |
| Verrucomicrobia | <i>Luteolibacter</i>                | 0.019  | 0.000  | 0.374 | 0.000  | 0.000  | NA    |
| Verrucomicrobia | <i>Opitutus</i>                     | 0.027  | 0.000  | 0.169 | 0.000  | 0.002  | 0.363 |
| Verrucomicrobia | <i>Prostheco bacter</i>             | 0.007  | 0.000  | 0.374 | 0.004  | 0.000  | 0.363 |

**Supplementary Table S2.** Mann-Whitney test of volatile metabolites between T0 and T1 in CG and IG groups. Median values of levels of each metabolite and the p values of each comparison were reported.

| volatile metabolites        | CG      |         |                | IG      |         |                |
|-----------------------------|---------|---------|----------------|---------|---------|----------------|
|                             | T0      | T1      | <i>p-value</i> | T0      | T1      | <i>p-value</i> |
| 1-Hexanol, 2-ethyl          | 0.00    | 0.00    | 0.91           | 7.18    | 12.42   | 0.91           |
| 1H-Indole, 5-methyl         | 0.00    | 0.00    | 0.76           | 193.39  | 0.00    | 0.61           |
| 1-Octene, 3-methyl          | 0.00    | 0.00    | 1.00           | 13.60   | 0.00    | 0.61           |
| 1-Pentanol                  | 0.00    | 0.00    | 1.00           | 59.63   | 0.13    | 0.61           |
| 2-Butanone, 3,3-dimethyl    | 0.00    | 0.00    | 0.76           | 3.04    | 0.00    | 0.61           |
| 2-Decanone                  | 0.00    | 16.43   | 0.26           | 0.00    | 0.00    | 0.91           |
| 2-Heptanone                 | 0.00    | 0.00    | 0.76           | 2.37    | 11.34   | 0.76           |
| 2-Nonanone                  | 0.00    | 0.00    | 0.91           | 0.00    | 0.00    | 0.91           |
| 2-Octanone                  | 67.62   | 83.17   | 0.26           | 78.58   | 155.83  | 0.26           |
| 2-Pentadecanone             | 0.00    | 0.00    | 0.76           | 79.81   | 95.32   | 0.91           |
| 2-Tetradecanone             | 0.00    | 30.83   | 0.26           | 0.00    | 0.00    | 0.76           |
| 2-Tridecanone               | 84.84   | 117.18  | 0.76           | 101.01  | 58.60   | 0.76           |
| 2-Undecanone                | 27.67   | 12.21   | 0.91           | 21.96   | 60.35   | 0.35           |
| 3-Heptanone                 | 0.00    | 0.00    | NA             | 14.52   | 0.00    | 0.61           |
| 3-Hexanone                  | 25.05   | 23.54   | 0.91           | 0.00    | 62.41   | 0.26           |
| 5-Hepten-2-one, 6-methyl    | 0.00    | 18.19   | 0.35           | 0.00    | 0.00    | 0.48           |
| 8-Nonen-2-one               | 0.00    | 0.00    | 0.61           | 8.50    | 0.00    | 0.91           |
| Benzaldehyde                | 334.77  | 946.51  | 0.35           | 411.00  | 687.41  | 0.48           |
| Butanal, 2-methyl           | 0.00    | 0.00    | 0.61           | 8.47    | 0.00    | 0.76           |
| Butanal, 3-methyl           | 0.00    | 0.00    | 0.76           | 6.16    | 20.99   | 0.61           |
| Butanal, 4-hydroxy-3-methyl | 20.23   | 0.00    | 0.26           | 0.00    | 0.00    | 0.76           |
| Butanoic acid               | 0.00    | 0.00    | 0.61           | 47.25   | 67.80   | 0.76           |
| Cyclopentadecane            | 7.42    | 0.00    | 1.00           | 17.32   | 29.64   | 0.61           |
| Dodecane                    | 20.59   | 0.00    | 0.04           | 13.26   | 25.26   | 0.48           |
| Furfural                    | 0.00    | 23.97   | 0.48           | 14.64   | 0.00    | 0.61           |
| Indole                      | 1219.46 | 4059.69 | 0.35           | 1086.13 | 1084.32 | 0.91           |

|                                |         |         |      |         |          |      |
|--------------------------------|---------|---------|------|---------|----------|------|
| Indole, 3-methyl               | 330.04  | 245.48  | 0.76 | 0.00    | 0.00     | 0.76 |
| Methyl Isobutyl Ketone         | 61.24   | 164.46  | 0.11 | 145.52  | 152.94   | 0.26 |
| p-Cresol                       | 2452.67 | 7449.69 | 0.76 | 9384.52 | 12851.27 | 0.91 |
| Phenol                         | 32.01   | 0.00    | 0.61 | 0.00    | 130.22   | 0.35 |
| Phenol, 3-methyl-              | 88.33   | 200.67  | 0.76 | 41.70   | 0.00     | 0.76 |
| Phenylethyl Alcohol            | 0.00    | 0.00    | 0.76 | 74.56   | 74.56    | 1.00 |
| Propanoic acid                 | 0.00    | 0.00    | 0.61 | 0.00    | 5.10     | 0.48 |
| Pyridine, 2,4,6-trimethyl      | 27.33   | 0.00    | 0.76 | 0.00    | 0.00     | 0.76 |
| Pyridine, 2-ethyl-4,6-dimethyl | 22.90   | 0.00    | 0.26 | 0.00    | 0.00     | NA   |
| Tetradecane                    | 0.00    | 0.00    | 0.91 | 0.00    | 0.00     | 0.91 |

**Supplementary Table S3.** Pearson's correlation analysis amongst genera constituting the Syngut product administered to IG patients (*i.e.*, *Lactobacillus* spp., *Bifidobacterium* spp., *Lactococcus* spp.) and SCFAs (*i.e.*, butanoic and propionic acids). Selected Pearson's rho values on the base of p value ( $p < 0.05$ ) were reported. In green Pearson's rho and p values statistically relevant.

| Pearson's correlation        | Bifidobacterium |                 | Lactobacillus |                 | Lactococcus |                 | Butanoic acid |                 | Propanoic acid |                 |
|------------------------------|-----------------|-----------------|---------------|-----------------|-------------|-----------------|---------------|-----------------|----------------|-----------------|
|                              | Rho value       | <i>p</i> -value | Rho value     | <i>p</i> -value | Rho value   | <i>p</i> -value | Rho value     | <i>p</i> -value | Rho value      | <i>p</i> -value |
| Acidaminococcus              | -0.24           | 0.65            | -0.22         | 0.67            | -0.35       | 0.49            | 0.73          | 0.10            | <b>0.92</b>    | <b>0.01</b>     |
| Actinomyces                  | <b>0.99</b>     | <b>0.00</b>     | <b>0.99</b>   | <b>0.00</b>     | -0.01       | 0.98            | 0.43          | 0.40            | 0.21           | 0.68            |
| Agrobacterium                | -0.24           | 0.65            | -0.23         | 0.66            | <b>0.89</b> | <b>0.02</b>     | -0.40         | 0.43            | -0.30          | 0.56            |
| Anaerostipes                 | -0.24           | 0.65            | -0.23         | 0.66            | <b>0.89</b> | <b>0.02</b>     | -0.40         | 0.43            | -0.30          | 0.56            |
| Bacteroides                  | -0.35           | 0.50            | -0.34         | 0.52            | <b>0.96</b> | <b>0.00</b>     | -0.57         | 0.24            | -0.44          | 0.39            |
| Brevibacterium               | <b>0.99</b>     | <b>0.00</b>     | <b>0.99</b>   | <b>0.00</b>     | -0.01       | 0.99            | 0.41          | 0.42            | 0.20           | 0.71            |
| Coprobacillus                | -0.24           | 0.65            | -0.22         | 0.67            | -0.35       | 0.49            | 0.73          | 0.10            | <b>0.92</b>    | <b>0.01</b>     |
| Coprococcus                  | <b>1.00</b>     | <b>0.00</b>     | <b>0.99</b>   | <b>0.00</b>     | -0.03       | 0.96            | 0.39          | 0.45            | 0.18           | 0.73            |
| Corynebacterium              | <b>0.97</b>     | <b>0.00</b>     | <b>0.97</b>   | <b>0.00</b>     | 0.02        | 0.96            | 0.35          | 0.49            | 0.15           | 0.77            |
| Eggerthella                  | <b>0.99</b>     | <b>0.00</b>     | <b>0.96</b>   | <b>0.00</b>     | -0.08       | 0.88            | 0.35          | 0.50            | 0.16           | 0.77            |
| Enterococcus                 | <b>1.00</b>     | <b>0.00</b>     | <b>0.99</b>   | <b>0.00</b>     | -0.02       | 0.97            | 0.40          | 0.44            | 0.19           | 0.72            |
| Lactobacillus                | <b>0.99</b>     | <b>0.00</b>     | <b>1.00</b>   | NA              | -0.06       | 0.91            | 0.44          | 0.39            | 0.18           | 0.73            |
| Leuconostoc                  | -0.25           | 0.63            | -0.24         | 0.65            | <b>0.88</b> | <b>0.02</b>     | -0.40         | 0.43            | -0.32          | 0.54            |
| Methanosphaera               | <b>0.99</b>     | <b>0.00</b>     | <b>0.99</b>   | <b>0.00</b>     | -0.01       | 0.99            | 0.41          | 0.42            | 0.20           | 0.71            |
| Ochrobactrum                 | -0.24           | 0.65            | -0.23         | 0.66            | <b>0.89</b> | <b>0.02</b>     | -0.40         | 0.43            | -0.30          | 0.56            |
| Paludibacter                 | <b>0.99</b>     | <b>0.00</b>     | <b>0.99</b>   | <b>0.00</b>     | -0.01       | 0.99            | 0.41          | 0.42            | 0.20           | 0.71            |
| Pediococcus                  | <b>0.99</b>     | <b>0.00</b>     | <b>0.99</b>   | <b>0.00</b>     | -0.01       | 0.99            | 0.41          | 0.42            | 0.20           | 0.71            |
| Peptococcus                  | <b>0.99</b>     | <b>0.00</b>     | <b>0.99</b>   | <b>0.00</b>     | 0.01        | 0.99            | 0.39          | 0.44            | 0.18           | 0.73            |
| Pseudoramibacter_Eubacterium | <b>0.99</b>     | <b>0.00</b>     | <b>0.99</b>   | <b>0.00</b>     | -0.01       | 0.98            | 0.41          | 0.43            | 0.18           | 0.73            |
| Pyramidobacter               | <b>0.99</b>     | <b>0.00</b>     | <b>0.99</b>   | <b>0.00</b>     | 0.07        | 0.90            | 0.39          | 0.45            | 0.18           | 0.74            |
| Staphylococcus               | <b>0.96</b>     | <b>0.00</b>     | <b>0.96</b>   | <b>0.00</b>     | 0.04        | 0.95            | 0.33          | 0.53            | 0.13           | 0.80            |
| Streptococcus                | <b>1.00</b>     | <b>0.00</b>     | <b>0.99</b>   | <b>0.00</b>     | -0.02       | 0.97            | 0.42          | 0.40            | 0.21           | 0.69            |
| 1-Hexanol, 2-ethyl           | -0.01           | 0.98            | 0.04          | 0.95            | -0.49       | 0.33            | <b>0.91</b>   | <b>0.01</b>     | <b>0.96</b>    | <b>0.00</b>     |
| 1-Octene, 3-methyl           | <b>0.99</b>     | <b>0.00</b>     | <b>0.99</b>   | <b>0.00</b>     | -0.01       | 0.99            | 0.41          | 0.42            | 0.20           | 0.71            |
| 2-Butanone, 3,3-dimethyl     | <b>0.92</b>     | <b>0.01</b>     | <b>0.96</b>   | <b>0.00</b>     | -0.16       | 0.77            | 0.44          | 0.39            | 0.10           | 0.85            |



|                        |             |             |             |             |       |      |             |             |             |             |
|------------------------|-------------|-------------|-------------|-------------|-------|------|-------------|-------------|-------------|-------------|
| 2-Heptanone            | 0.11        | 0.83        | 0.19        | 0.72        | -0.57 | 0.24 | <b>0.93</b> | <b>0.01</b> | <b>0.84</b> | <b>0.04</b> |
| 2-Pentadecanone        | 0.59        | 0.22        | 0.65        | 0.16        | -0.46 | 0.36 | <b>0.95</b> | <b>0.00</b> | 0.76        | 0.08        |
| 2-Tetradecanone        | -0.24       | 0.65        | -0.22       | 0.67        | -0.35 | 0.49 | 0.73        | 0.10        | <b>0.92</b> | <b>0.01</b> |
| 2-Tridecanone          | 0.30        | 0.57        | 0.34        | 0.52        | -0.44 | 0.38 | <b>0.98</b> | <b>0.00</b> | <b>0.98</b> | <b>0.00</b> |
| 2-Undecanone           | 0.02        | 0.97        | -0.02       | 0.97        | -0.60 | 0.21 | 0.71        | 0.11        | <b>0.86</b> | <b>0.03</b> |
| 3-Heptanone            | <b>0.96</b> | <b>0.00</b> | <b>0.99</b> | <b>0.00</b> | -0.11 | 0.84 | 0.44        | 0.39        | 0.14        | 0.79        |
| 8-Nonen-2-one          | <b>0.81</b> | <b>0.05</b> | <b>0.87</b> | <b>0.02</b> | -0.22 | 0.67 | 0.42        | 0.41        | 0.05        | 0.93        |
| Benzaldehyde           | 0.75        | 0.09        | 0.75        | 0.09        | -0.34 | 0.50 | <b>0.87</b> | <b>0.03</b> | 0.76        | 0.08        |
| Butanal, 3-methyl      | 0.09        | 0.86        | 0.13        | 0.81        | -0.09 | 0.87 | <b>0.84</b> | <b>0.04</b> | <b>0.93</b> | <b>0.01</b> |
| Butanoic acid          | 0.39        | 0.45        | 0.44        | 0.39        | -0.48 | 0.34 | <b>1.00</b> | NA          | <b>0.92</b> | <b>0.01</b> |
| Cyclopentadecane       | -0.14       | 0.80        | -0.11       | 0.83        | -0.40 | 0.44 | <b>0.81</b> | <b>0.05</b> | <b>0.96</b> | <b>0.00</b> |
| Furfural               | -0.24       | 0.65        | -0.22       | 0.67        | -0.35 | 0.49 | 0.73        | 0.10        | <b>0.92</b> | <b>0.01</b> |
| Indole                 | -0.25       | 0.64        | -0.23       | 0.66        | -0.28 | 0.60 | 0.72        | 0.11        | <b>0.91</b> | <b>0.01</b> |
| Methyl Isobutyl Ketone | <b>0.99</b> | <b>0.00</b> | <b>0.96</b> | <b>0.00</b> | -0.04 | 0.94 | 0.27        | 0.61        | 0.05        | 0.92        |
| p-Cresol               | 0.21        | 0.69        | 0.25        | 0.64        | -0.49 | 0.32 | <b>0.97</b> | <b>0.00</b> | <b>0.98</b> | <b>0.00</b> |
| Phenol, 3-methyl-      | -0.26       | 0.61        | -0.25       | 0.64        | -0.34 | 0.51 | 0.71        | 0.12        | <b>0.90</b> | <b>0.01</b> |
| Phenylethyl Alcohol    | <b>0.81</b> | 0.05        | <b>0.87</b> | <b>0.03</b> | 0.11  | 0.83 | 0.30        | 0.56        | -0.04       | 0.95        |
| Propanoic acid         | 0.16        | 0.76        | 0.18        | 0.73        | -0.39 | 0.45 | <b>0.92</b> | <b>0.01</b> | <b>1.00</b> | NA          |
| Tetradecane            | -0.24       | 0.65        | -0.22       | 0.67        | -0.35 | 0.49 | 0.73        | 0.10        | <b>0.92</b> | <b>0.01</b> |
